# Supplementary material
Source: PubMed Central journal article supplement (PMC548854)
Supplement: plntphys_pp.104.047357_1.pdf [file plntphys_pp.104.047357_1.pdf]

**Table 1.** Root malate and phosphate exudation rates (pmoles/root/h) of six maize genotypes exposed to different Al<sup>3+</sup> activities. Exudation collections were performed a two different 24 hour period intervals (Day 1-2 and Day 3-4). Genotypes have been sorted from left to right in order of decreasing Al-resistance. The values are the mean of six replicates ± the standard error of the mean (SEM).

I-----Decreasing Al resistance----->

| Time Interval | Al <sup>3+</sup> Activity (µM) | Cateto-Colombia | Pioneer 3355 | Mo17      | B73       | L53       | 11x726    |
|---------------|--------------------------------|-----------------|--------------|-----------|-----------|-----------|-----------|
| Day 1-2       | 0                              | 223 ± 18        | 144 ± 18     | 576 ± 199 | 76 ± 30   | 160 ± 27  | 135 ± 50  |
|               | 5                              | 95 ± 11         | 203 ± 73     | 317 ± 35  | 321 ± 123 | 114 ± 29  | 145 ± 16  |
|               | 10                             | 191 ± 35        | 255 ± 29     | 341 ± 77  | 185 ± 17  | 114 ± 30  | 154 ± 40  |
|               | 20                             | 346 ± 34        | 281 ± 67     | 198 ± 23  | 239 ± 18  | 358 ± 117 | 287 ± 226 |
|               | 40                             | 401 ± 79        | 271 ± 54     | 282 ± 90  | 340 ± 59  | 255 ± 73  | 271 ± 72  |
|               | 80                             | 205 ± 76        | 350 ± 180    | 516 ± 349 | 516 ± 215 | 381 ± 91  | 413 ± 98  |
| Day 3-4       | 0                              | 348 ± 113       | 414 ± 166    | 855 ± 146 | 162 ± 28  | 247 ± 44  | 157 ± 20  |
|               | 5                              | 188 ± 23        | 813 ± 436    | 566 ± 193 | 162 ± 54  | 274 ± 66  | 272 ± 75  |
|               | 10                             | 562 ± 267       | 178 ± 27     | 254 ± 55  | 311 ± 43  | 224 ± 33  | 116 ± 12  |
|               | 20                             | 141 ± 48        | 286 ± 27     | 322 ± 130 | 168 ± 50  | 329 ± 127 | 346 ± 75  |
|               | 40                             | 294 ± 78        | 467 ± 139    | 178 ± 16  | 256 ± 46  | 129 ± 15  | 252 ± 50  |
|               | 80                             | 241 ± 54        | 217 ± 40     | 525 ± 223 | 280 ± 55  | 256 ± 64  | 189 ± 23  |

**Table 2.** Root malate and phosphate content ( $\mu\text{moles/g FW}$ ) of six maize genotypes exposed to different  $\text{Al}^{3+}$  activities. The values are the mean of six replicates  $\pm$  the standard error of the mean (SEM).

| $\text{Al}^{3+}$<br>Activity<br>( $\mu\text{M}$ ) | Cateto-<br>Colombia | Pioneer 3355   | Mo17          | B73           | L53           | 11x726        |
|---------------------------------------------------|---------------------|----------------|---------------|---------------|---------------|---------------|
| 0                                                 | $9.1 \pm 1.3$       | $11.6 \pm 0.7$ | $8.2 \pm 1.0$ | $4.5 \pm 0.7$ | $3.3 \pm 0.5$ | $6.7 \pm 0.4$ |
| 5                                                 | $6.2 \pm 1.2$       | $9.9 \pm 0.5$  | $7.6 \pm 0.4$ | $3.4 \pm 0.1$ | $3.1 \pm 0.5$ | $6.1 \pm 0.2$ |
| 10                                                | $5.9 \pm 0.8$       | $7.8 \pm 2.8$  | $6.8 \pm 0.7$ | $4.7 \pm 1.1$ | $3.7 \pm 0.4$ | $7.5 \pm 1.9$ |
| 20                                                | $6.4 \pm 1.3$       | $8.9 \pm 0.3$  | $8.5 \pm 0.9$ | $4.9 \pm 0.5$ | $4.3 \pm 0.7$ | $4.2 \pm 0.2$ |
| 30                                                | $5.6 \pm 2.1$       | $7.2 \pm 0.3$  | $9.1 \pm 0.2$ | $5.7 \pm 0.1$ | $4.1 \pm 0.3$ | $4.2 \pm 0.4$ |
| 40                                                | $4.0 \pm 0.4$       | $11.0 \pm 0.8$ | $9.4 \pm 0.4$ | $8.4 \pm 0.7$ | $5.8 \pm 0.6$ | $6.7 \pm 0.3$ |
